# Supplementary material for: Modulation of Distinct Asthmatic Phenotypes in Mice by Dose-Dependent Inhalation of Microbial Products
Source: PubMed Central journal article supplement (PMC3888577; doi:10.1289/ehp.1307280), 2013-10-29
Supplement: ehp.1307280.s001.508.pdf [file ehp.1307280.s001.508.pdf]

**Supplemental Material**

**Modulation of Distinct Asthmatic Phenotypes in Mice by Dose-Dependent  
Inhalation of Microbial Products**

Gregory S. Whitehead, Seddon Y. Thomas, and Donald N. Cook

**Table of Contents:**

**Figure S1.** Effect of inhaled LPS dose during allergen sensitization on airway inflammation in BALB/c mice.

**Figure S2.** Effect of inhaled LPS dose during allergen sensitization on airway reactivity to methacholine (MCH) in C57BL/6 (A) and BALB/c (B) mice.

**Figure S3.** Endotoxin and allergens in HDEs.

Figure S1

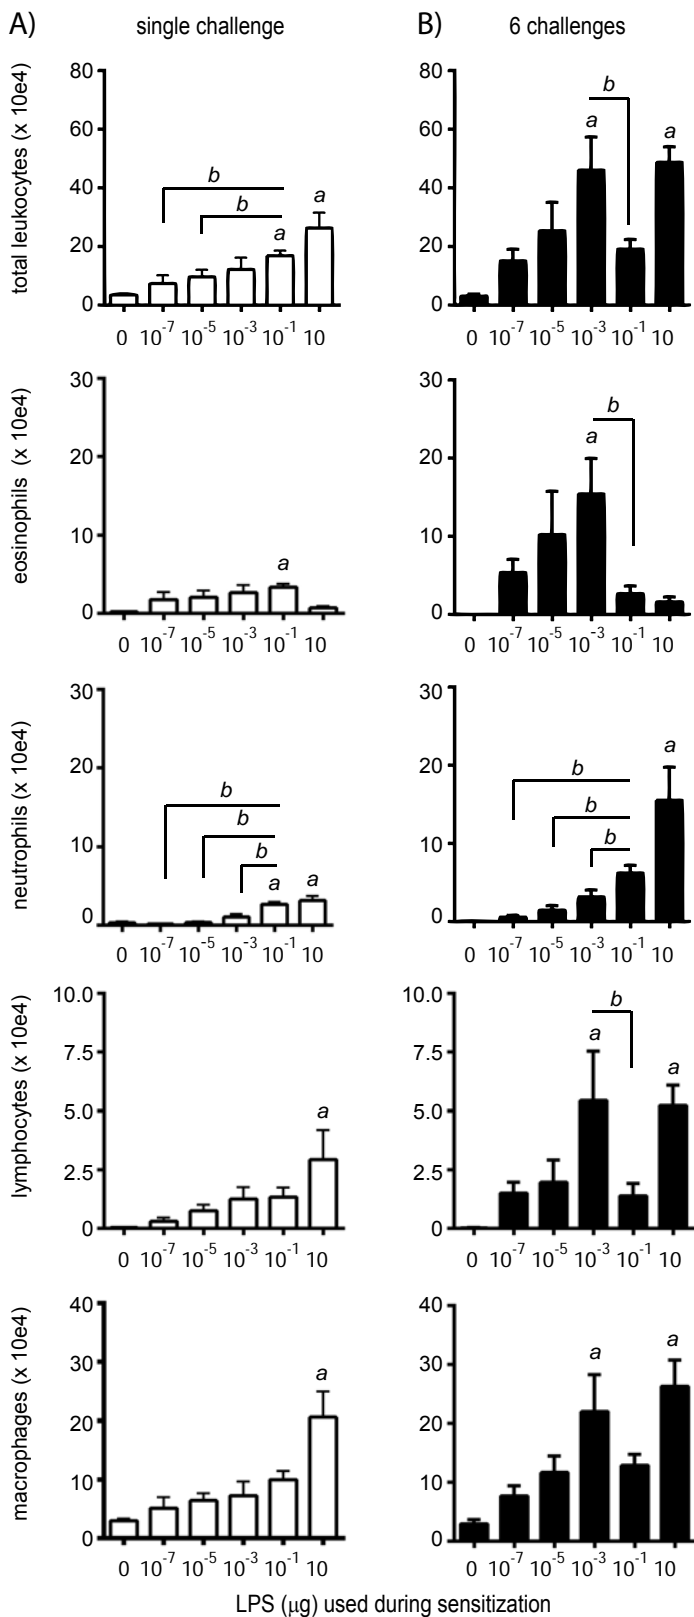

**Figure S1. Effect of inhaled LPS dose during allergen sensitization on airway inflammation in BALB/c mice.** Mice sensitized to OVA using the indicated amounts of LPS were challenged to aerosolized OVA on a single occasion (A), or on six consecutive days (B). Shown are mean cell numbers  $\pm$  SEM of the indicated leukocyte subsets in BAL 48 h after the last challenge. Data are from one of 2 independent experiments giving similar results.  $n = 6$  mice/group. *a*,  $P < 0.05$ , OVA-LPS sensitized mice vs. 'OVA only' controls; *b*,  $P < 0.05$ , 10<sup>-1</sup> µg LPS vs. lower dose LPS groups.

Figure S2

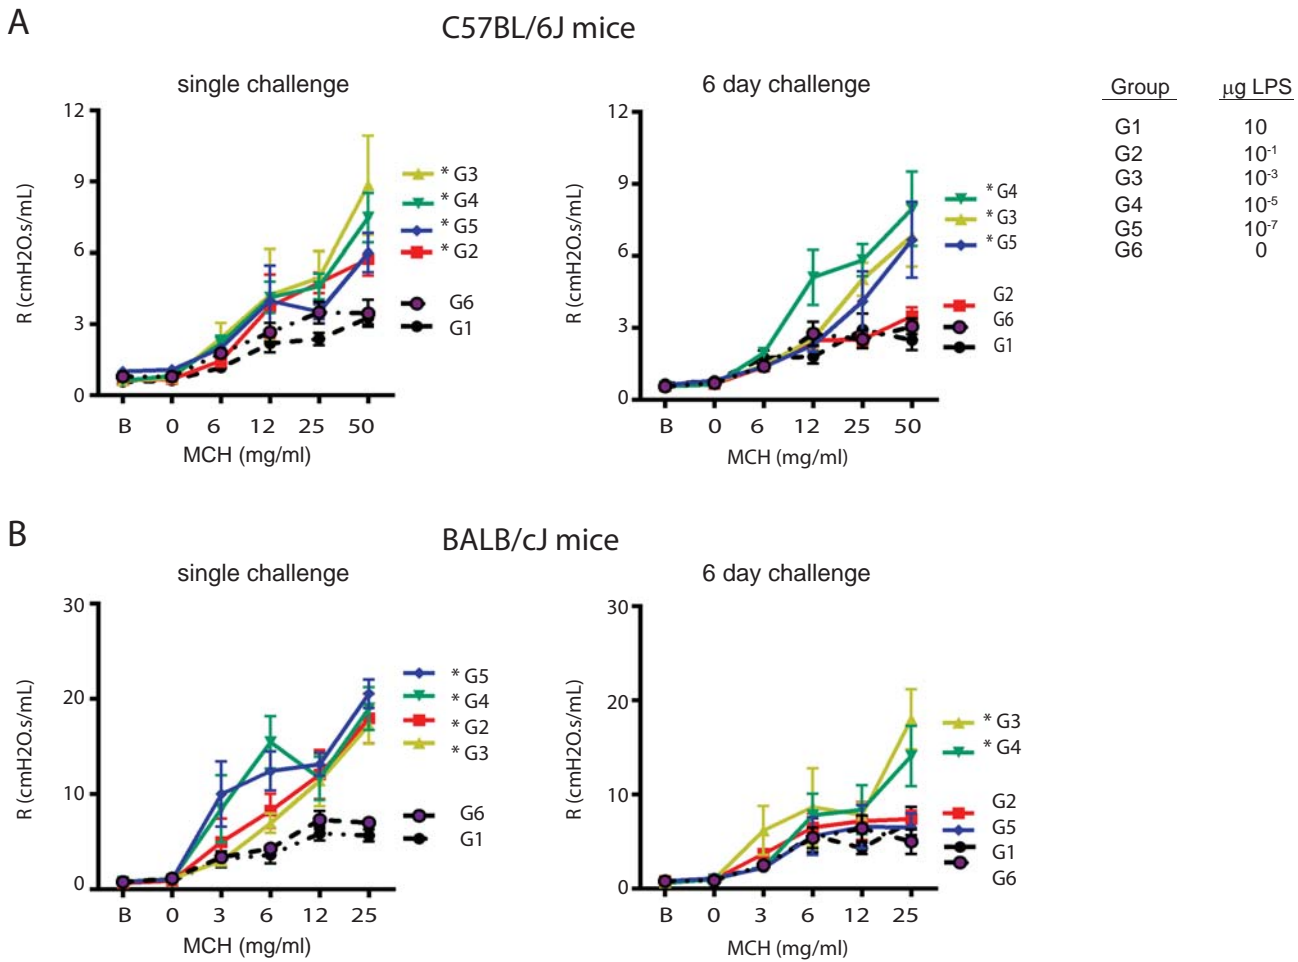

**Figure S2. Effect of inhaled LPS dose during allergen sensitization on airway reactivity to methacholine (MCH) in C57BL/6 (A) and BALB/c (B) mice.** Airway resistance (R) was measured in mice sensitized to OVA together with the amount of LPS indicated for each group, and then subsequently challenged with aerosolized OVA on a single occasion or on 6 consecutive days. Shown are the mean R values  $\pm$  SEM from peak responses at each dose of MCH. The data from C57BL/6 mice are from one of 2 independent experiments giving similar results; the data from the BALB/c mice are from a single experiment.  $n = 6$  mice/group. \*  $P < 0.05$ ; OVA-LPS sensitized mice vs. 'OVA only' controls.

Figure S3

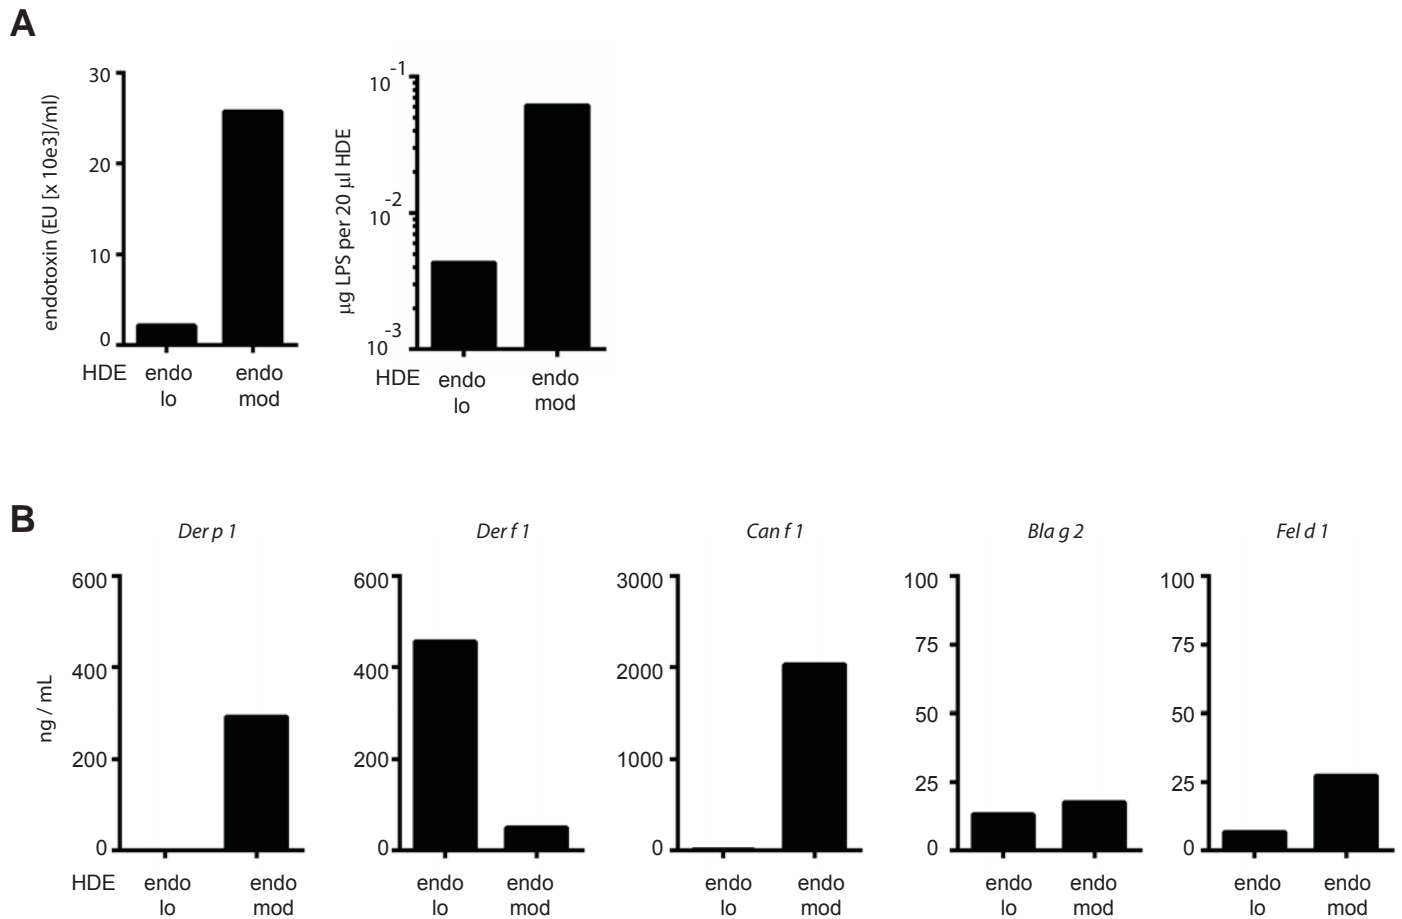

**Figure S3. Endotoxin and allergens in HDEs.** (A) The number of endotoxin units (EU) per ml of each HDE is shown, as well as a LPS mass equivalent ( $\mu\text{g}$ ) for a 20  $\mu\text{l}$  sample of each HDE. (B) Allergen content of HDEs. Allergens assayed include those derived from the house dust mites *Dermatophagoides pteronyssinus* (*Der p 1*) and *Dermatophagoides farina* (*Der f 1*), dog *Canus familiaris* (*Can f 1*), German cockroach *Blatella Germanica* (*Bla g 2*), and cat *Felis catus* (*Fel d 1*).
